# Supplementary material for: Thin laminar composite solid electrolyte with high ionic conductivity and mechanical strength towards advanced all-solid-state lithium–sulfur battery
Source: Royal Society of Chemistry journal article supplement (doi:10.1039/d0ta07630a), 2020-01-01
Supplement: d0ta07630a1.pdf [file d0ta07630a1.pdf]

## Supporting Information

### **Thin laminar composite solid electrolyte with high ionic conductivity and mechanical strength towards advanced all-solid-state lithium–sulfur battery**

Pengfei Zhai<sup>a,1</sup>, Na Peng<sup>a,1</sup>, Zeyu Sun<sup>a</sup>, Wenjia Wu<sup>a,\*</sup>, Weijie Kou<sup>a</sup>, Guoshi Cui<sup>b</sup>,  
Kang Zhao<sup>b</sup>, Jingtao Wang<sup>a,c,\*</sup>

<sup>a</sup>School of Chemical Engineering, Zhengzhou University, Zhengzhou 450001, P. R. China

<sup>b</sup>Henan Kegao Radiation Chemical Technology Co., Ltd, Luoyang 471023, P. R. China

<sup>c</sup>Henan Institute of Advanced Technology, Zhengzhou University, 97 Wenhua Road Zhengzhou  
450003, P. R. China

\*To whom correspondence should be addressed: E-mail: [wenjiawu@zzu.edu.cn](mailto:wenjiawu@zzu.edu.cn) (W.J. Wu);

[jingtaowang@zzu.edu.cn](mailto:jingtaowang@zzu.edu.cn) (J.T. Wang).

<sup>1</sup>These authors contributed equally to this work.

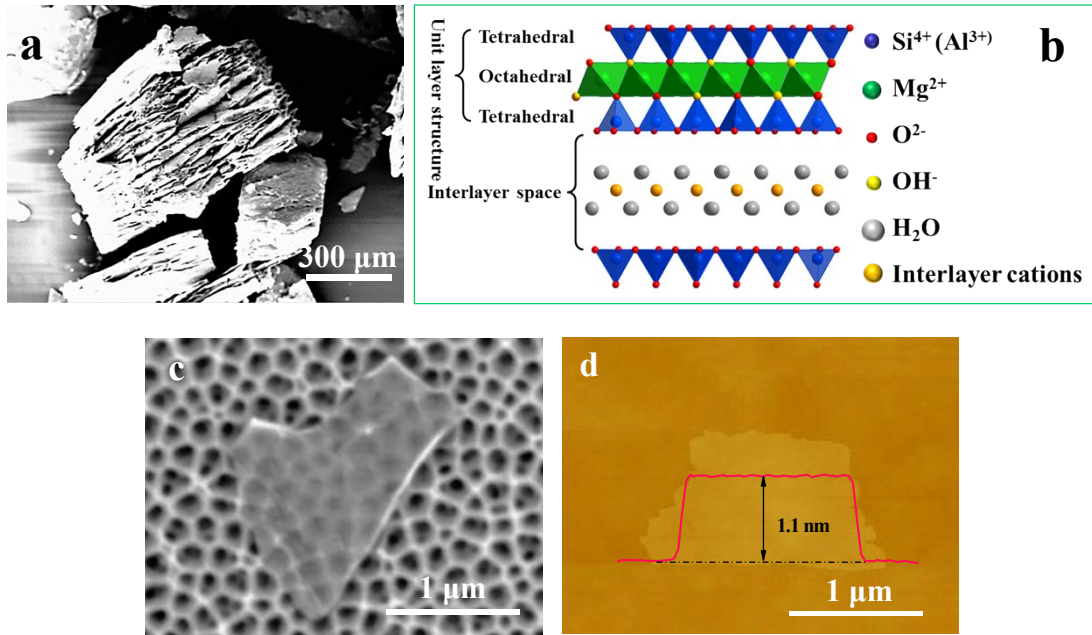

**Fig. S1** (a) SEM image of vermiculite crystal. (b) Structure model of vermiculite nanosheet. (c) SEM image of vermiculite nanosheet. (d) AFM image and the corresponding height profile of vermiculite nanosheet.

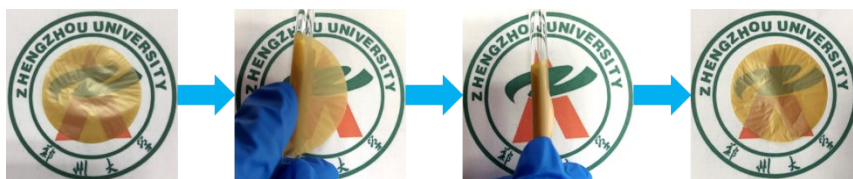

**Fig. S2** Photographs of the as-prepared laminar vermiculite framework.

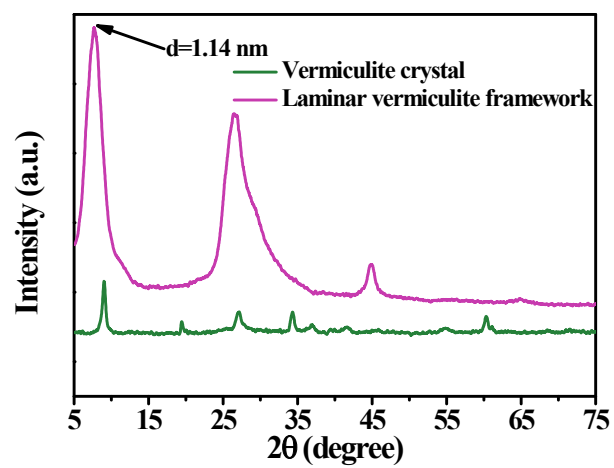

**Fig. S3** XRD patterns of vermiculite crystal and laminar vermiculite framework.

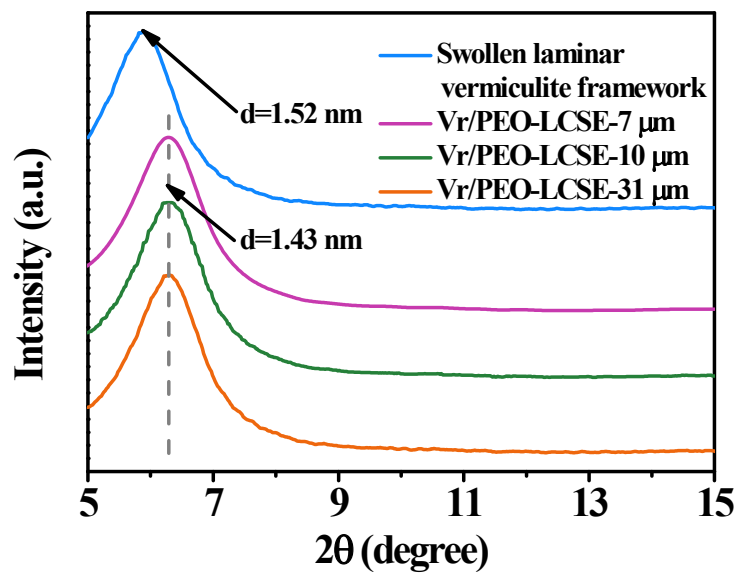

Fig. S4 XRD patterns of swollen laminar vermiculite framework and Vr/PEO-LCSE with different thicknesses.

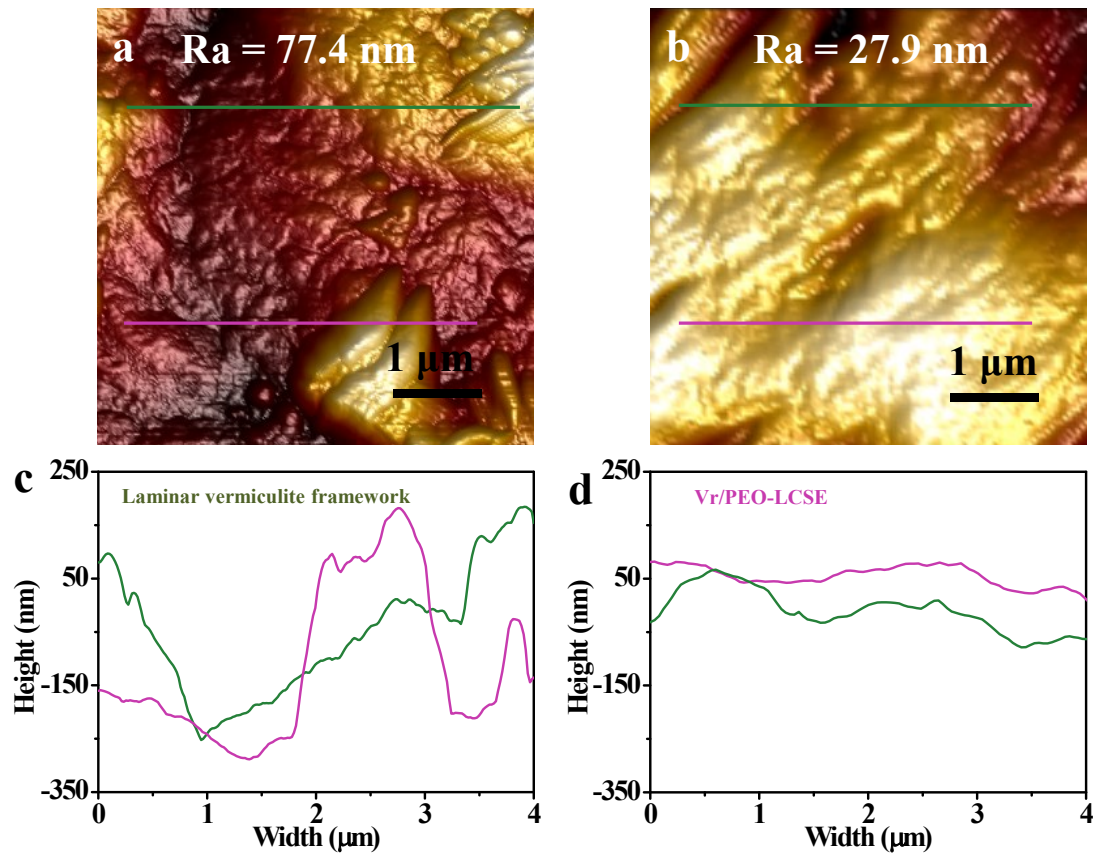

**Fig. S5** (a) AFM image and (c) the corresponding height profiles of laminar vermiculite framework. (b) AFM image and (d) the corresponding height profiles of Vr/PEO-LCSE.

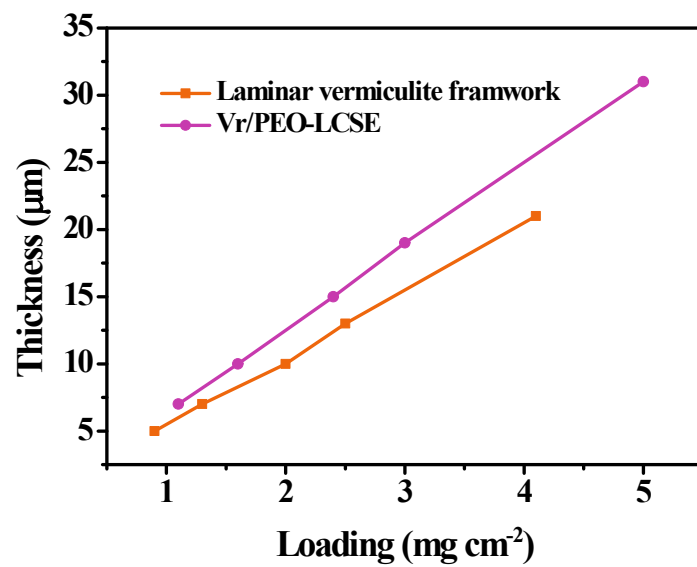

**Fig. S6** The thickness of laminar vermiculite framework and Vr/PEO-LCSE as a function of vermiculite nanosheet loading amounts.

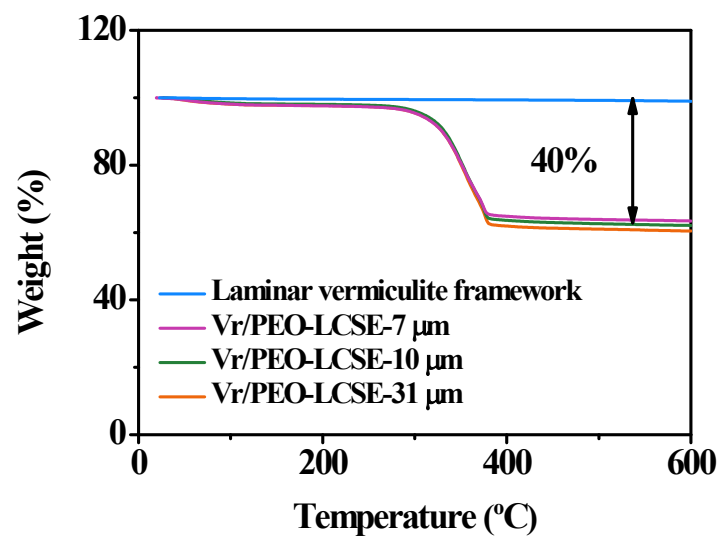

**Fig. S7** TGA curves of laminar vermiculite framework and Vr/PEO-LCSE with different thicknesses.



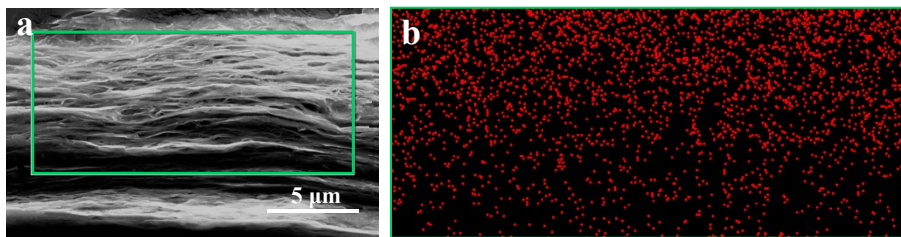

**Fig. S8** (a) Cross-sectional SEM image of Vr/PEO-LCSE prepared without swelling process and (b) the corresponding EDS elemental mapping of C.

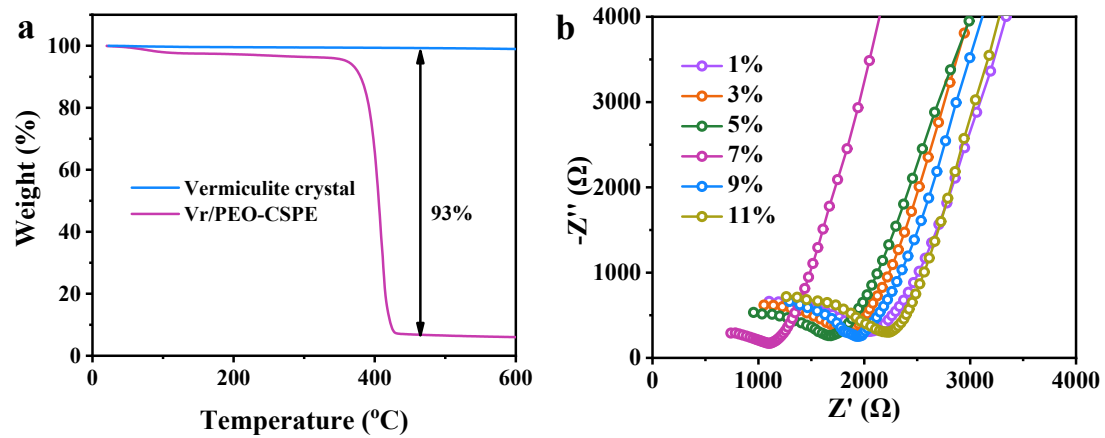

**Fig. S9** (a) TGA curves of vermiculite crystal and Vr/PEO-CSPE. (b) Nyquist plots of Vr/PEO-CSPE-X (X = 1%, 3%, 5%, 7%, 9%, and 11%) at 25 °C.

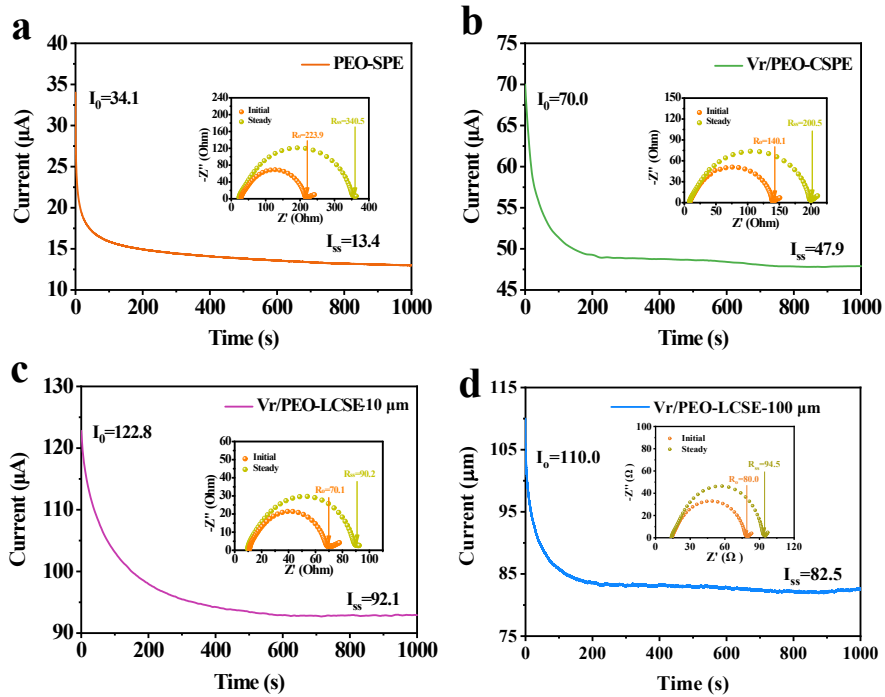

**Fig. S10** The chronoamperometry curves of PEO-SPE, Vr/PEO-CSPE, Vr/PEO-LCSE-10  $\mu\text{m}$ , and Vr/PEO-LCSE-100  $\mu\text{m}$  at 45  $^\circ\text{C}$  (Inset: AC impedance curves of the corresponding cells before and after polarization).

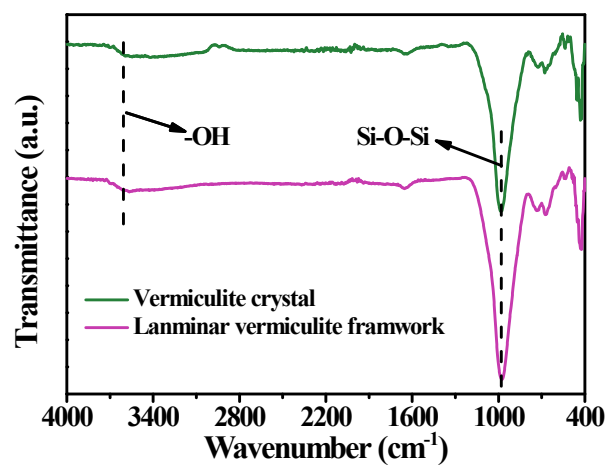

**Fig. S11** FTIR spectra of vermiculite crystal and laminar vermiculite framework.

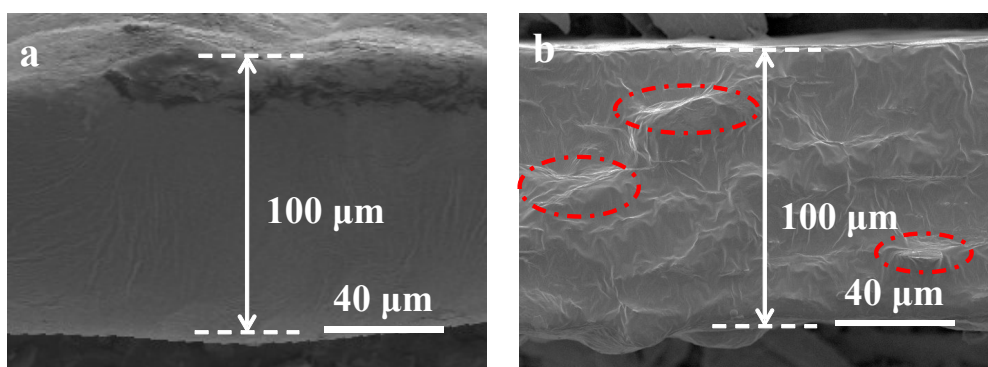

**Fig. S12** Cross-sectional SEM images of (a) PEO-SPE and (b) Vr/PEO-CSPE.

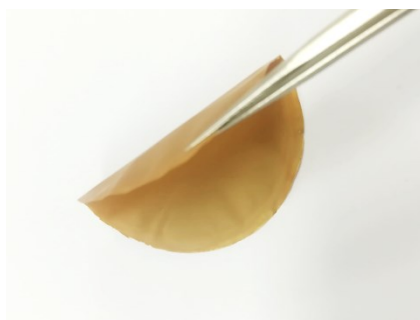

**Fig. S13** Optical image of Vr/PEO-LCSE with thickness of 10  $\mu\text{m}$ .

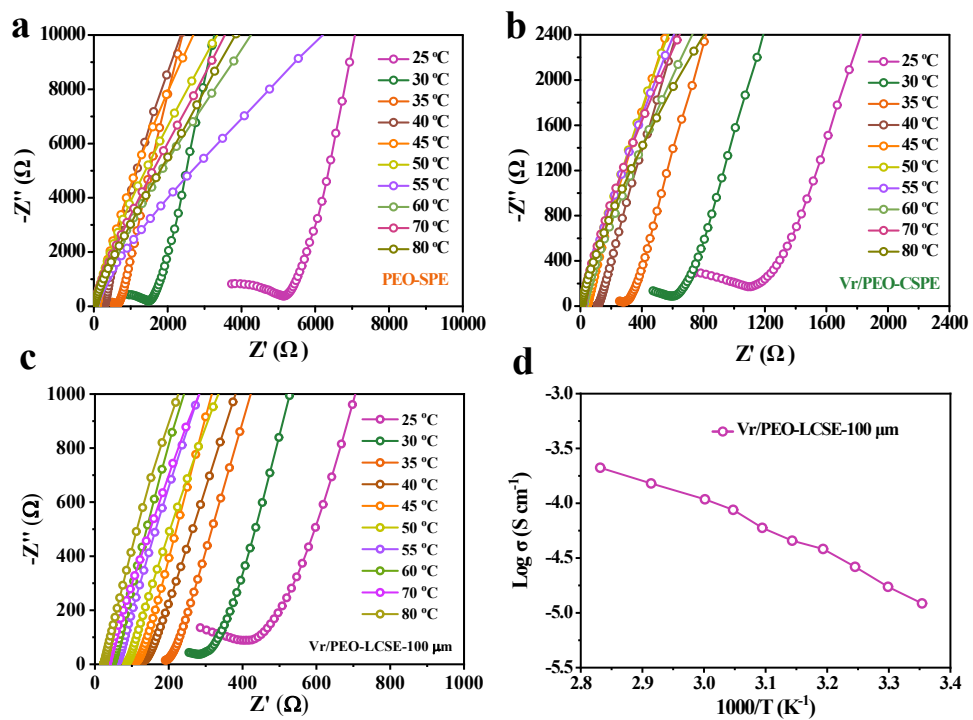

**Fig. S14** Curves of (a) PEO-SPE, (b) Vr/PEO-CSPE, and (c) Vr/PEO-LCSE-100  $\mu\text{m}$  at different temperatures. (d) Ionic conductivity of Vr/PEO-LCSE-100  $\mu\text{m}$ .

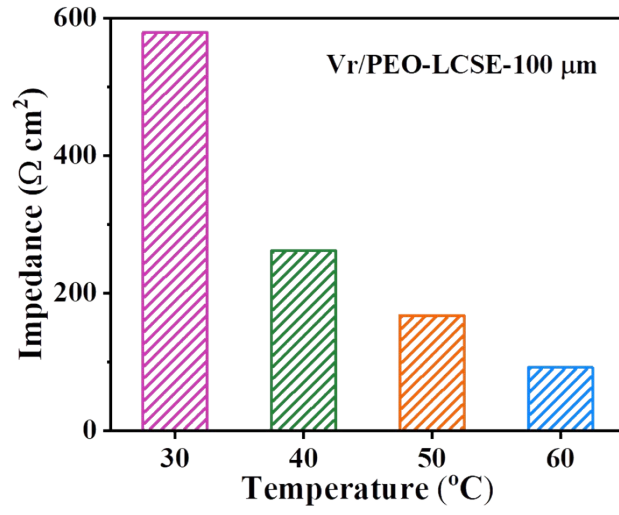

**Fig. S15** ASR of Vr/PEO-LCSE-100  $\mu\text{m}$  at different temperatures.



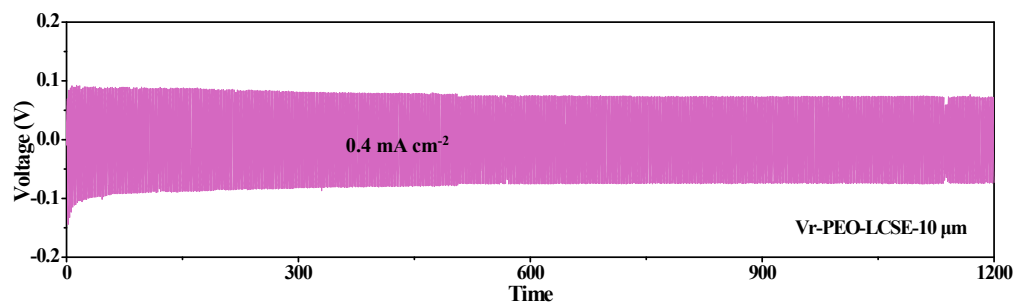

**Fig. S16** Li-Li symmetric cell behavior of Vr/PEO-LCSE at 60 °C under current density of 0.4 mA cm<sup>-2</sup>.

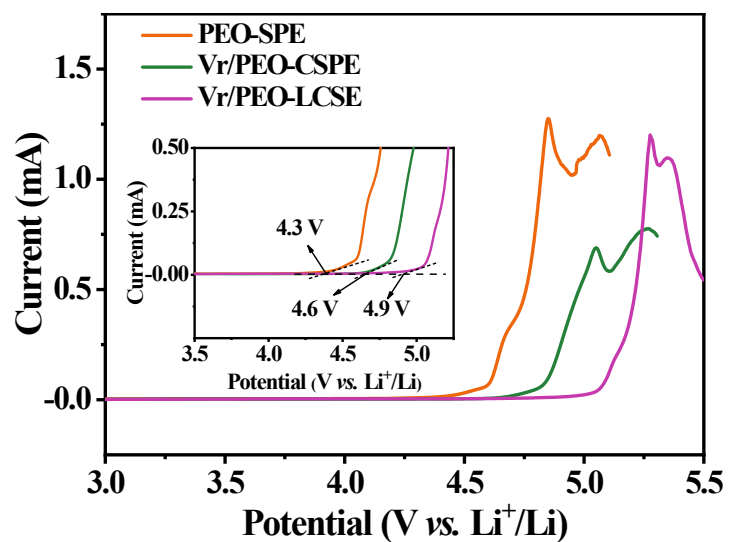

Fig. S17 Linear sweep voltammetry curves of PEO-SPE, Vr/PEO-CSPE, and Vr/PEO-LCSE.

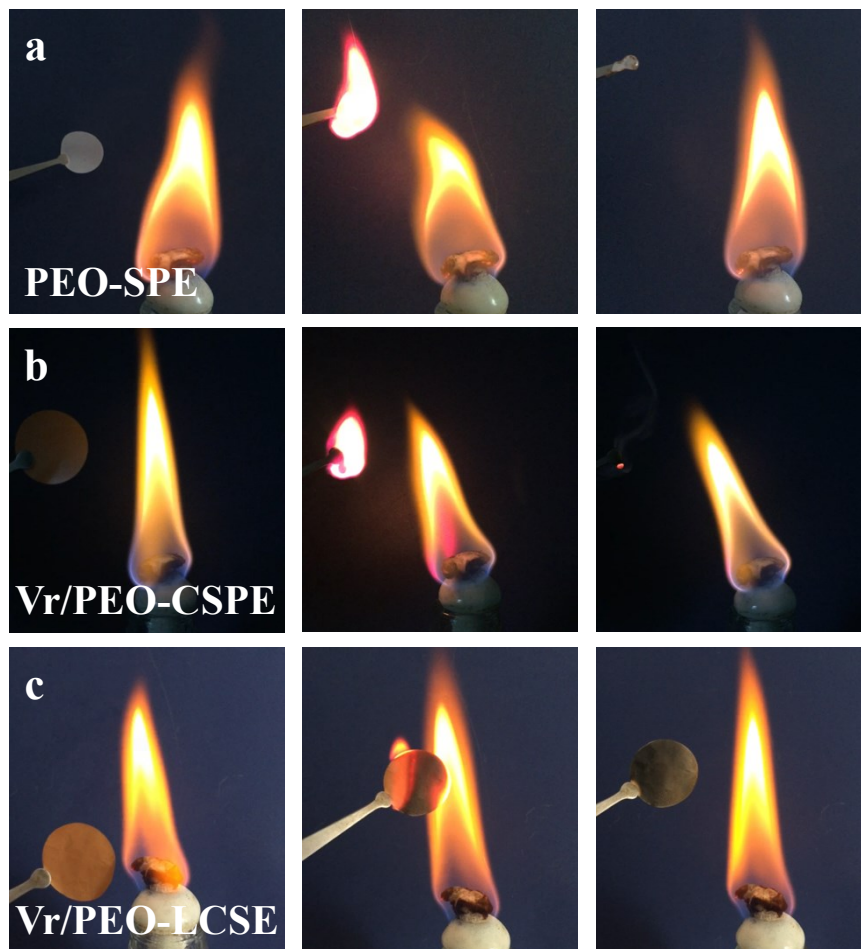

**Fig. S18** Photographs of PEO-SPE, Vr/PEO-CSPE, and Vr/PEO-LCSE before and after burning.

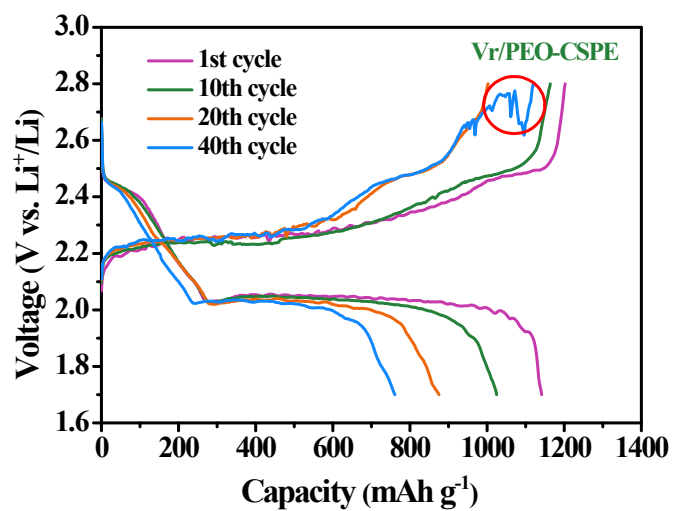

**Fig. S19** Charge-discharge voltage curves of Li | Vr/PEO-CSPE | S cell at 0.05 C and 60 °C.

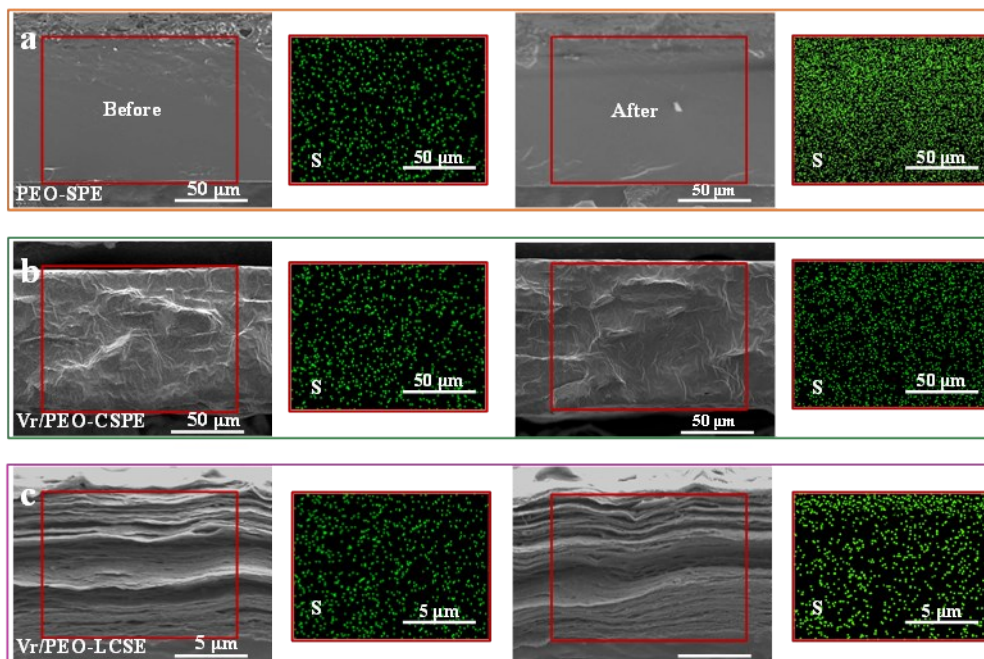

**Fig. S20** Cross-sectional SEM image and the corresponding EDS elemental (S) mapping of (a) PEO-SPE, (b) Vr/PEO-CSPE, and (c) Vr/PEO-LCSE before and after 6 cycles.

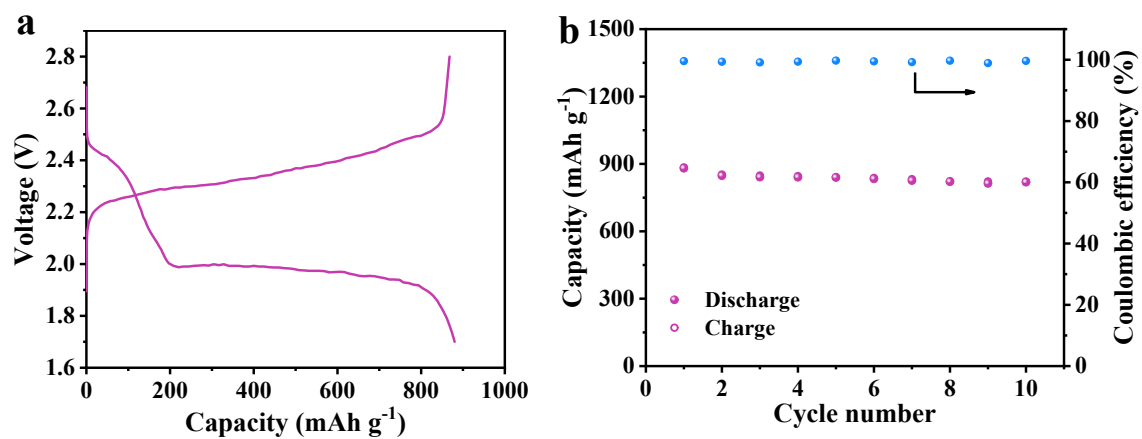

**Fig. S21**(a) Charge-discharge voltage curves of Li | V<sub>r</sub>/PEO-LCSE | S cell with S loading cathode of 3.0 mg cm<sup>-2</sup> at 0.1 C and 60 °C and (b) the corresponding cycling performance.

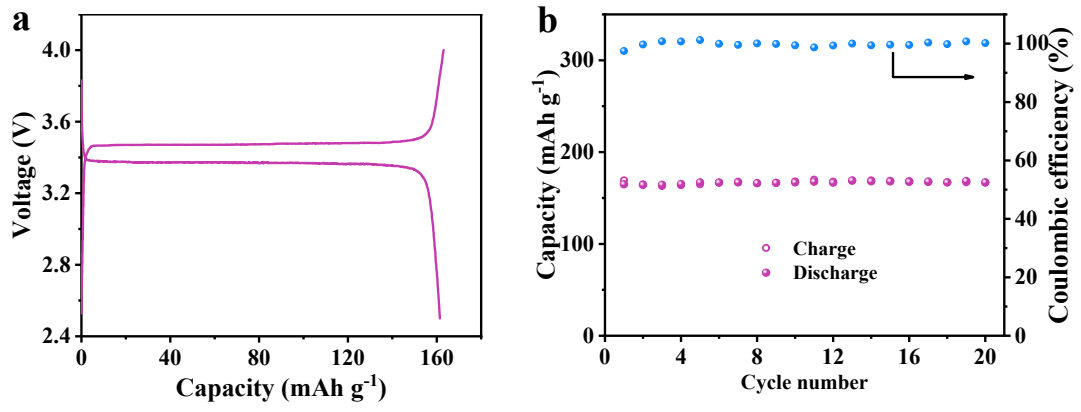

**Fig. S22** (a) Charge-discharge voltage curves of Li | Vr/PEO-LCSE | LFP cell at 0.5 C and 60 °C and (b) the corresponding cycling performance.

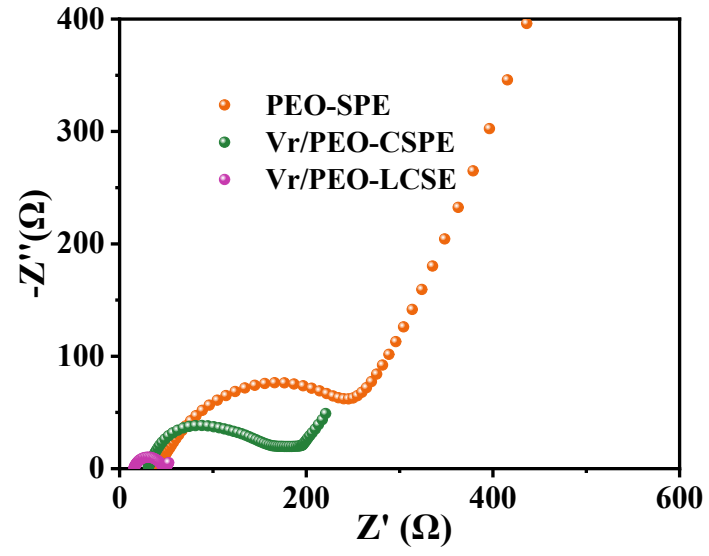

**Fig. S23** The EIS impedance spectra of Li | PEO-SPE | S, Li | Vr/PEO-CSPE | S, and Li | Vr/PEO-LCSE | S cells after 5 cycles.



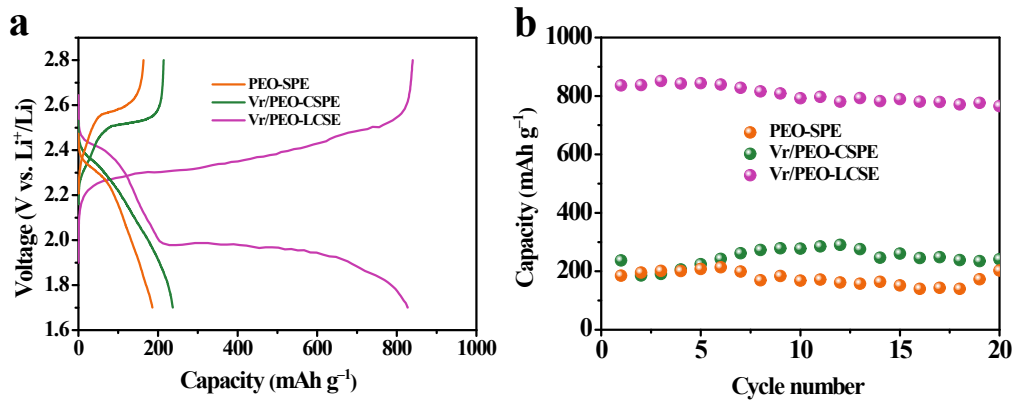

**Fig. S24** (a) Charge-discharge voltage curves of Li | PEO-SPE | S, Li | Vr/PEO-CSPE | S, and Li | Vr/PEO-LCSE | S cells at 0.05 C and 45 °C and (b) the corresponding cycling performances.

**Table S1** Summary of the performances of recently reported solid-state electrolytes.

| Solid-state electrolyte                       | Conductivity (S cm <sup>-1</sup> ) | Thickness (μm) | Tensile strength (MPa) | ARS (Ω cm <sup>2</sup> ) | Reference |
|-----------------------------------------------|------------------------------------|----------------|------------------------|--------------------------|-----------|
| PEO/LiTFSI/5% MnO <sub>2</sub>                | 1.95×10 <sup>-5</sup> (30 °C)      | 90             | 1.27                   | 461                      | 1         |
| PEO/LiTFSI/6% h-BN                            | 7.7×10 <sup>-6</sup> (30 °C)       | 70             | 0.98                   | 909                      | 2         |
| PEO/LiTFSI/5% g-C <sub>3</sub> N <sub>4</sub> | 1.7×10 <sup>-5</sup> (30 °C)       | 120            | 1.8                    | 706                      | 3         |
| PEO/LiTFSI/10% VS                             | 2.9×10 <sup>-5</sup> (30 °C)       | 94             | 0.8                    | 326                      | 4         |
| PEO/LiTFSI/15%SN/10% LiAlO <sub>2</sub>       | 1.36×10 <sup>-5</sup> (30 °C)      | 80             | 0.88                   | 588                      | 5         |
| PEO/LiClO <sub>4</sub> /5% clay-CNT           | 3.16×10 <sup>-5</sup> (30 °C)      | 260            | 0.8                    | 823                      | 6         |
| PEO/LiClO <sub>4</sub> /1% GO                 | 2×10 <sup>-5</sup> (30 °C)         | 240            | 1.27                   | 1200                     | 7         |
|                                               | 1.3×10 <sup>-5</sup> (25 °C)       | 260            | 0.2                    | 2000                     | 8         |
| PEO/LiTFSI                                    | 2.37×10 <sup>-6</sup> (30 °C)      | 80             | 1.25                   | 3376                     | 9         |
|                                               | 5.55×10 <sup>-6</sup> (25 °C)      | 130            | 0.61                   | 2342                     | 10        |
|                                               | 1.33×10 <sup>-5</sup> (30 °C)      | 200            | 0.18                   | 1504                     | 11        |
| PEO/LiClO <sub>4</sub>                        | 4×10 <sup>-6</sup> (30 °C)         | 240            | 0.35                   | 6000                     | 7         |

### Supplementary References

1. Y. Li, Z. Sun, D. Liu, Y. Gao, Y. Wang, H. Bu, M. Li, Y. Zhang, G. Gao and S. Ding, *J. Mater. Chem. A*, 2020, **8**, 2021-2032.
2. Y. Li, L. Zhang, Z. Sun, G. Gao, S. Lu, M. Zhu, Y. Zhang, Z. Jia, C. Xiao, H. Bu, K. Xi and S. Ding, *J. Mater. Chem. A*, 2020, **8**, 9579-9589.
3. Z. Sun, Y. Li, S. Zhang, L. Shi, H. Wu, H. Bu and S. Ding, *J. Mater. Chem. A*, 2019, **7**, 11069-11076.
4. W. Tang, S. Tang, C. Zhang, Q. Ma, Q. Xiang, Y.-W. Yang and J. Luo, *Adv. Energy Mater.*, 2018, **8**, 1800866.

5. N. Zhang, J. He, W. Han and Y. Wang, *J. Mater. Sci.*, 2019, **54**, 9603-9612.
6. C. Tang, K. Hackenberg, Q. Fu, P. M. Ajayan and H. Ardebili, *Nano Lett.*, 2012, **12**, 1152-1156.
7. M. Yuan, J. Erdman, C. Tang and H. Ardebili, *RSC Adv.*, 2014, **4**, 59637-59642.
8. L. Liu, J. Lyu, J. Mo, H. Yan, L. Xu, P. Peng, J. Li, B. Jiang, L. Chu and M. Li, *Nano Energy*, 2020, **69**, 104398.
9. O. Sheng, C. Jin, J. Luo, H. Yuan, H. Huang, Y. Gan, J. Zhang, Y. Xia, C. Liang, W. Zhang and X. Tao, *Nano Lett.*, 2018, **18**, 3104-3112.
10. Q. Han, S. Wang, Z. Jiang, X. Hu and H. Wang, *ACS Appl. Mater. Interfaces*, 2020, **12**, 20514-20521.
11. C. Tao, M.-H. Gao, B.-H. Yin, B. Li, Y.-P. Huang, G. Xu and J.-J. Bao, *Electrochim. Acta*, 2017, **257**, 31-39.
